# Supplementary material
Source: PubMed Central journal article supplement (PMC5960322)
Supplement: pnas.1801692115.sapp.pdf [file pnas.1801692115.sapp.pdf]

## Supplementary Information Appendix

### *Data and assumptions*

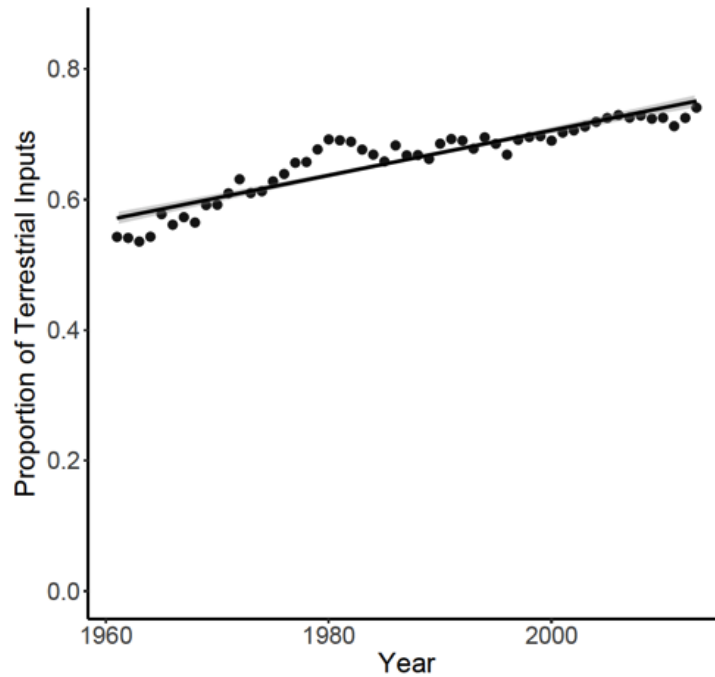

**Figure S1.** Proportion of inputs from the seven crops (wheat, maize, soy, rapeseed, pulses, barley, and cassava) used for all animal feed relative to other terrestrial feeds from 1961-2013. The increasing trend is statistically significant (F-stat = 287, df = 52,  $P < 0.001$ ,  $R_{\text{adj}}^2 = 0.85$ ). If this linear trend persists to 2050, these seven crops would contribute to the vast majority of crop inputs (mean  $\pm$  SE =  $0.88 \pm 0.01$ ) and thus land-use. Data sourced from Food Balance Sheets from FAOStat (1).

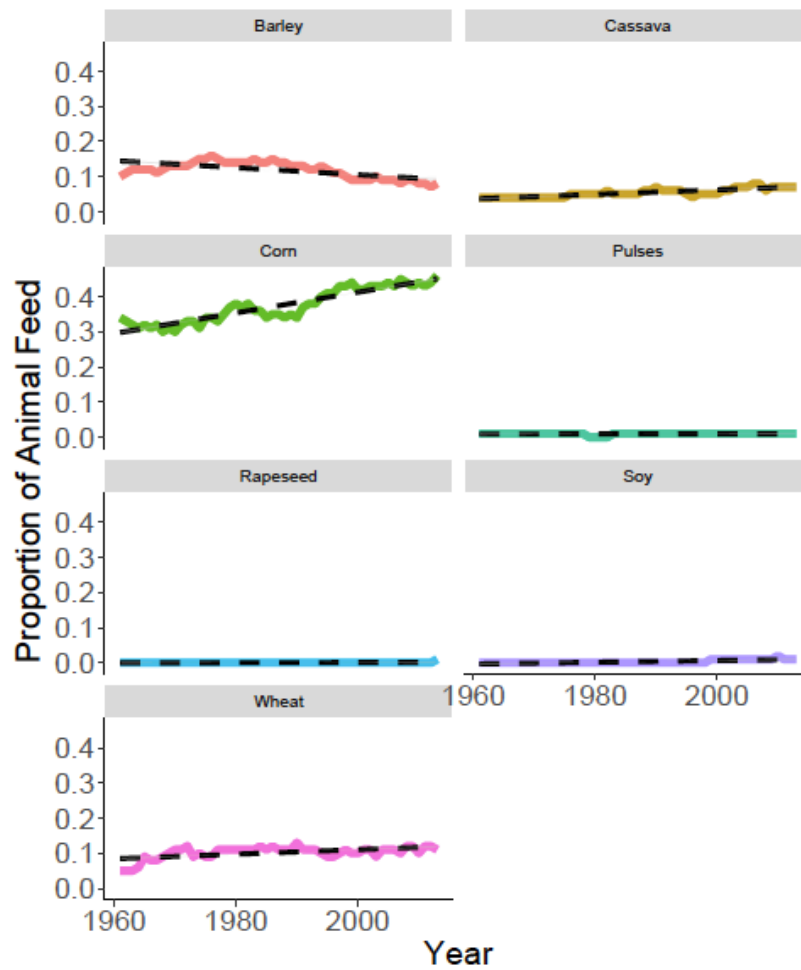

**Figure S2.** Proportional crop feed inclusion over time estimated by FAO for the seven crops used in this study. *Dash lines* indicate the linear model results for each crop type. Linear trends statistically significant ( $p < 0.001$ ), except for pulses and rapeseed ( $p = 0.37$  and  $p = 0.09$ , respectively), which remain constant.

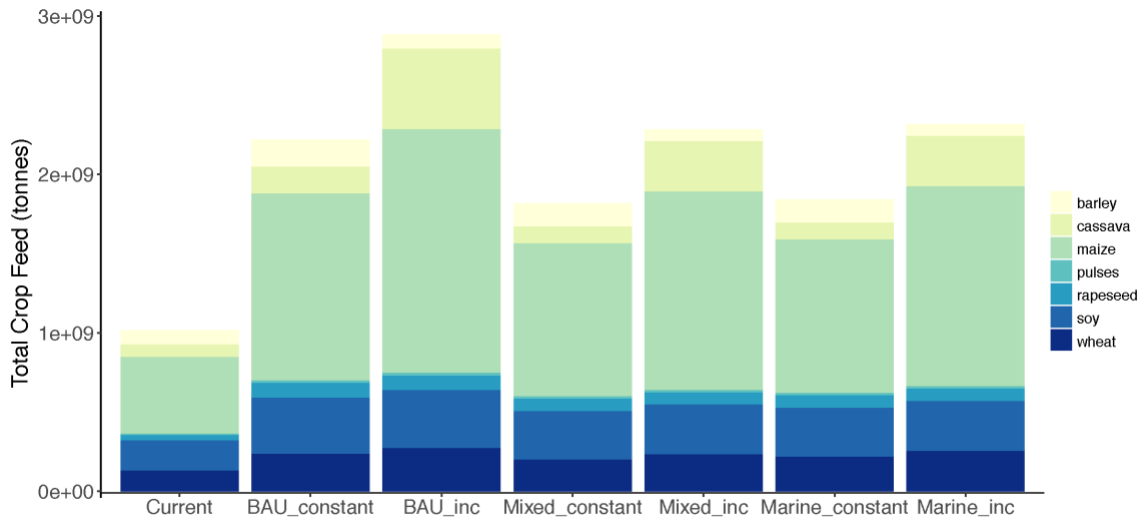

**Figure S3.** Estimates of animal feed crops with (*inc*) and without (*constant*) greater inclusion and homogenization of the seven crop assessed in this study for each scenario.

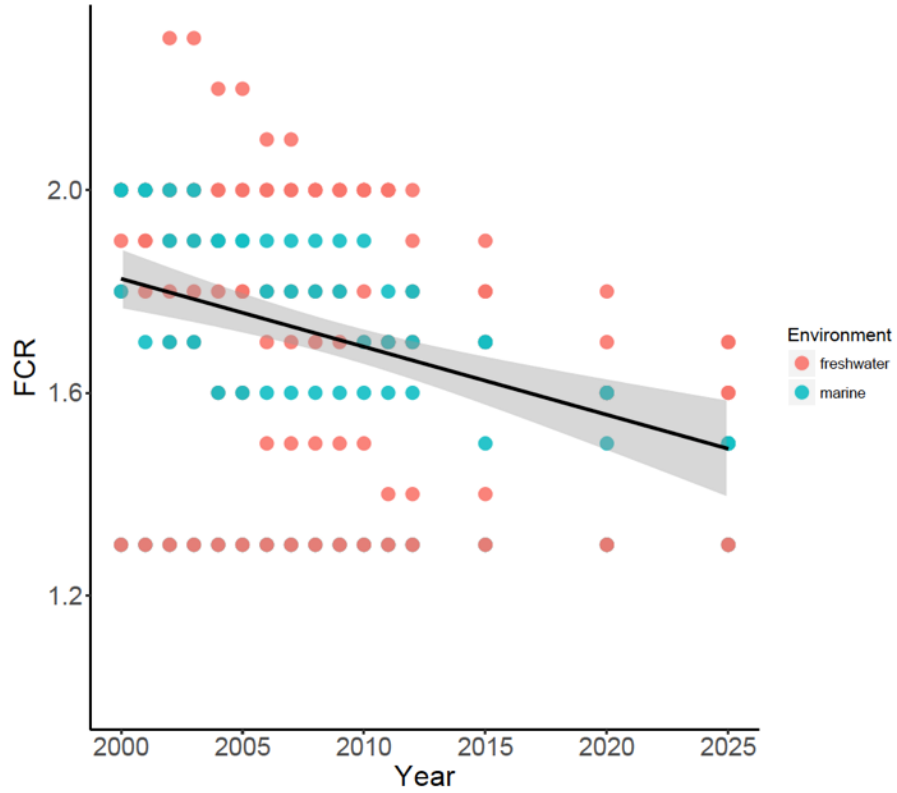

**Figure S4.** Feed conversion ratios (FCR;  $F_a$  parameter in our study) of aquaculture species/groups reported in Tacon and Metian (2). (Linear model: F-stat = 25.6, df = 174,  $R^2_{adj} = 0.12$ ,  $p < 0.001$ ).

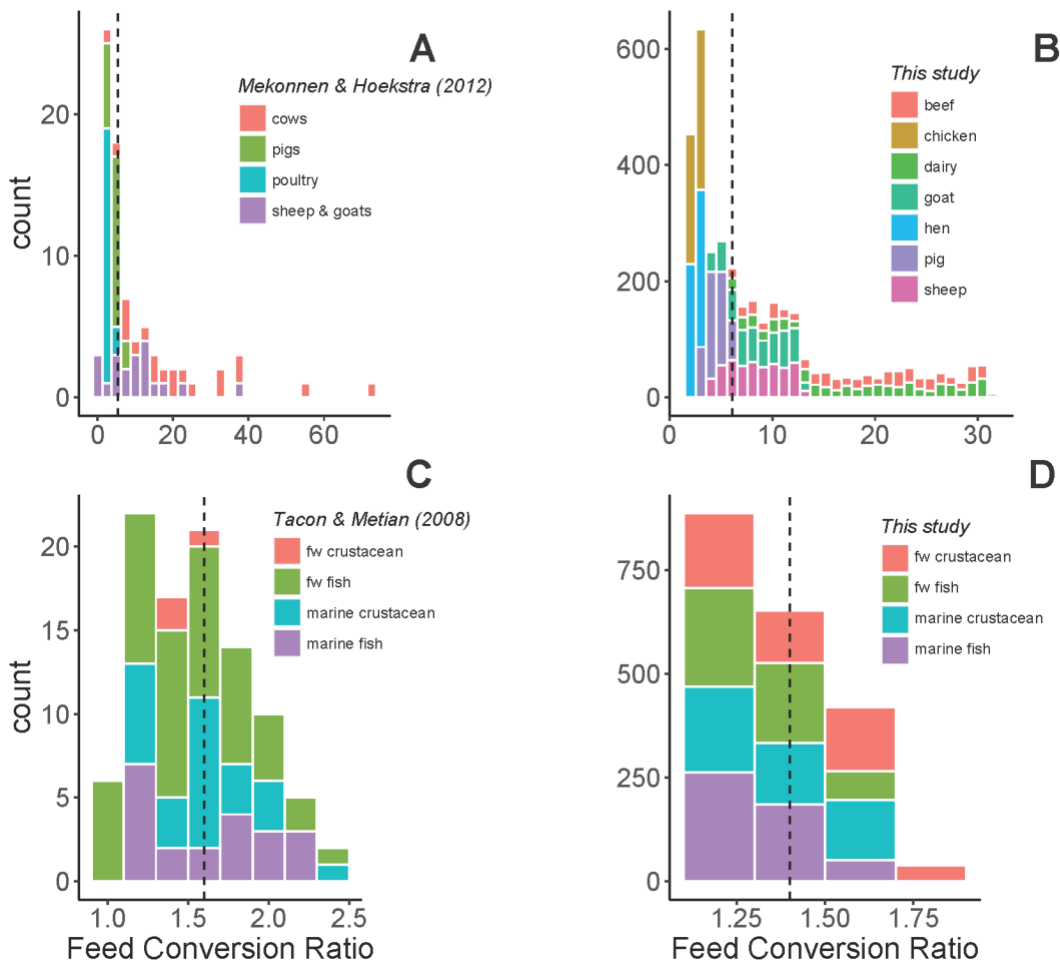

**Figure S5.** Regional feed conversion ratio distributions for livestock and poultry (*top panels*) and fed aquaculture groups (*bottom panels*) from (A) Mekonnen and Hoekstra (3) and (B) this study ( $n_{\text{simulations}} = 500$ ), and (C) Tacon and Metian (4), and, (D) this study combined. The median values shown as *dashed lines*. Note, the Tacon and Metian (4) values in *panel C* are self-reported, country values from a 2005/2007 survey. Our values (*panel C*) are based on the average improved efficiencies reported in Tacon and Metian (2), that are not country specific, but result in an average 0.2 global reduction in feed conversion ratios – reflected in the original (2005/2007) median equal to 1.6 and our median of 1.4.

**Table S1.** Average proportion of edible biomass derived from Bognár and Tilman and Clark (5, 6).

| <b>Animal</b>           | <b>Edible</b> |
|-------------------------|---------------|
| Ruminants               | 0.6           |
| Dairy cow & laying hen* | 2.2           |
| Pig                     | 0.5           |
| Broiler chicken         | 0.6           |
| Fish                    | 0.7           |
| Crustacean              | 0.3           |
| Mollusc                 | 0.2           |

*\*More edible biomass produced from dairy and eggs*

**Table S2.** Assigned proportion of livestock biomass produced by either feed ( $P_j$ ) or grazing ( $1-P_j$ ), for each region. Data source, Mekonnen and Hoekstra (3).

| <b>Region</b>              | <b>Ruminant Fed (<math>P_j</math>)</b> | <b>Ruminant Grazed (<math>1-P_j</math>)</b> |
|----------------------------|----------------------------------------|---------------------------------------------|
| <i>Australia</i>           | 0.69                                   | 0.31                                        |
| <i>Canada</i>              | 0.82                                   | 0.18                                        |
| <i>Caribbean</i>           | 0.69                                   | 0.31                                        |
| <i>Central America</i>     | 0.64                                   | 0.36                                        |
| <i>China</i>               | 0.90                                   | 0.10                                        |
| <i>Eastern Africa</i>      | 0.44                                   | 0.56                                        |
| <i>Eastern Asia</i>        | 0.90                                   | 0.10                                        |
| <i>Europe</i>              | 0.85                                   | 0.15                                        |
| <i>East Europe and CIS</i> | 0.63                                   | 0.37                                        |
| <i>Island Nations</i>      | 0.69                                   | 0.31                                        |
| <i>Central Africa</i>      | 0.44                                   | 0.56                                        |
| <i>Middle East</i>         | 0.54                                   | 0.46                                        |
| <i>New Zealand</i>         | 0.69                                   | 0.31                                        |
| <i>Northern Africa</i>     | 0.54                                   | 0.46                                        |
| <i>South America</i>       | 0.64                                   | 0.36                                        |
| <i>Southern Africa</i>     | 0.44                                   | 0.56                                        |
| <i>Southern Asia</i>       | 0.91                                   | 0.09                                        |
| <i>USA</i>                 | 0.82                                   | 0.18                                        |
| <i>Western Africa</i>      | 0.44                                   | 0.56                                        |
| <i>Western Asia</i>        | 0.54                                   | 0.46                                        |

**Table S3.** Ranges of future percent increases in animal production. Uniform ranges sampled for future animal production scenarios derived from Tilman and Clark (6), Bognár (5), FAO (7), and Alexandratos and Bruinsma (8). These ranges represent likely minimum and maximum amounts of respective animal production in 2050, used in our scenario simulations to account for uncertainty in projection estimates. *See Methods for details.*

| <b>Nations</b> | <b>Taxa</b>       | <b>Range</b> |
|----------------|-------------------|--------------|
| Developed      | beef              | 11-51%       |
| Developed      | goat              | 0-24%        |
| Developed      | sheep             | 0-26%        |
| Developed      | broiler chicken   | 10-50%       |
| Developed      | pig               | 20-60%       |
| Developed      | dairy cow         | 0-37%        |
| Developed      | laying hen        | 0-37%        |
| Developed      | marine fish       | 80-120%      |
| Developed      | marine crustacean | 80-120%      |
| Developed      | fw fish           | 80-120%      |
| Developed      | fw crustacean     | 80-120%      |
| Developed      | mollusc           | 80-120%      |
| Developing     | beef              | 31-71%       |
| Developing     | goat              | 4-44%        |
| Developing     | sheep             | 6-46%        |
| Developing     | broiler chicken   | 30-70%       |
| Developing     | pig               | 40-80%       |
| Developing     | dairy cow         | 17-57%       |
| Developing     | laying hen        | 17-57%       |
| Developing     | marine fish       | 100-140%     |
| Developing     | marine crustacean | 100-140%     |
| Developing     | fw fish           | 100-140%     |
| Developing     | fw crustacean     | 100-140%     |
| Developing     | mollusc           | 100-140%     |



**Table S4.** Average 2050 regional diet proportions ( $A_{i,a}$ ) for farmed taxa, by crop. Initial values derived from Tilman and Clark (6), Tacon and Metian (2), and FAO data (1). Proportions that do not add to 1 are assumed to reflect inputs from other sources (e.g., aquatic inputs).

| Region          | Group          | Wheat | Maize | Soy  | Rapeseed | Pulses | Barley | Cassava |
|-----------------|----------------|-------|-------|------|----------|--------|--------|---------|
| Australia       | freshwater aq. | 0.47  | 0.06  | 0.22 | 0.03     | 0.22   | 0      | 0       |
| Canada          | freshwater aq. | 0.47  | 0.06  | 0.22 | 0.03     | 0.22   | 0      | 0       |
| Caribbean       | freshwater aq. | 0.37  | 0.26  | 0.27 | 0.01     | 0.09   | 0      | 0       |
| Central Africa  | freshwater aq. | 0.21  | 0.4   | 0.39 | 0        | 0      | 0      | 0       |
| Central America | freshwater aq. | 0.37  | 0.32  | 0.31 | 0        | 0      | 0      | 0       |
| China           | freshwater aq. | 0.16  | 0.33  | 0.51 | 0        | 0      | 0      | 0       |
| Eastern Africa  | freshwater aq. | 0.24  | 0.41  | 0.35 | 0        | 0      | 0      | 0       |
| Eastern Asia    | freshwater aq. | 0.37  | 0.17  | 0.31 | 0.02     | 0.13   | 0      | 0       |
| Europe          | freshwater aq. | 0.47  | 0.06  | 0.22 | 0.03     | 0.22   | 0      | 0       |
| Middle East     | freshwater aq. | 0.36  | 0.28  | 0.32 | 0.01     | 0.03   | 0      | 0       |
| New Zealand     | freshwater aq. | 0.48  | 0.07  | 0.21 | 0.03     | 0.21   | 0      | 0       |
| Northern Africa | freshwater aq. | 0.34  | 0.31  | 0.31 | 0.01     | 0.03   | 0      | 0       |
| Other           | freshwater aq. | 0.35  | 0.28  | 0.3  | 0.01     | 0.06   | 0      | 0       |
| South America   | freshwater aq. | 0.46  | 0.19  | 0.22 | 0.02     | 0.11   | 0      | 0       |
| Southern Africa | freshwater aq. | 0.46  | 0.29  | 0.22 | 0        | 0.03   | 0      | 0       |
| Southern Asia   | freshwater aq. | 0.33  | 0.3   | 0.33 | 0.01     | 0.03   | 0      | 0       |
| USA             | freshwater aq. | 0.47  | 0.06  | 0.22 | 0.03     | 0.22   | 0      | 0       |
| Western Africa  | freshwater aq. | 0.2   | 0.39  | 0.41 | 0        | 0      | 0      | 0       |
| Western Asia    | freshwater aq. | 0.45  | 0.22  | 0.22 | 0.01     | 0.1    | 0      | 0       |
| Australia       | marine aq.     | 0.47  | 0.17  | 0.22 | 0.03     | 0      | 0      | 0       |
| Canada          | marine aq.     | 0.47  | 0.17  | 0.22 | 0.03     | 0      | 0      | 0       |
| Caribbean       | marine aq.     | 0.37  | 0.35  | 0.27 | 0.01     | 0      | 0      | 0       |
| Central America | marine aq.     | 0.37  | 0.32  | 0.31 | 0        | 0      | 0      | 0       |
| China           | marine aq.     | 0.16  | 0.33  | 0.51 | 0        | 0      | 0      | 0       |
| Eastern Africa  | marine aq.     | 0.24  | 0.41  | 0.35 | 0        | 0      | 0      | 0       |
| Eastern Asia    | marine aq.     | 0.37  | 0.28  | 0.31 | 0.02     | 0      | 0      | 0       |
| Europe          | marine aq.     | 0.47  | 0.17  | 0.22 | 0.03     | 0      | 0      | 0       |
| Middle East     | marine aq.     | 0.36  | 0.31  | 0.32 | 0.01     | 0      | 0      | 0       |
| New Zealand     | marine aq.     | 0.48  | 0.18  | 0.21 | 0.03     | 0      | 0      | 0       |
| Northern Africa | marine aq.     | 0.34  | 0.34  | 0.31 | 0.01     | 0      | 0      | 0       |
| Other           | marine aq.     | 0.35  | 0.34  | 0.3  | 0.01     | 0      | 0      | 0       |
| South America   | marine aq.     | 0.46  | 0.29  | 0.22 | 0.02     | 0      | 0      | 0       |
| Southern Africa | marine aq.     | 0.46  | 0.32  | 0.22 | 0        | 0      | 0      | 0       |
| Southern Asia   | marine aq.     | 0.33  | 0.33  | 0.33 | 0.01     | 0      | 0      | 0       |
| USA             | marine aq.     | 0.47  | 0.17  | 0.22 | 0.03     | 0      | 0      | 0       |
| Western Africa  | marine aq.     | 0.2   | 0.39  | 0.41 | 0        | 0      | 0      | 0       |

|                     |            |      |      |      |      |      |      |      |
|---------------------|------------|------|------|------|------|------|------|------|
| <i>Western Asia</i> | marine aq. | 0.45 | 0.31 | 0.22 | 0.01 | 0    | 0    | 0    |
| <i>All regions</i>  | beef       | 0    | 0.54 | 0    | 0.08 | 0.15 | 0    | 0    |
| <i>All regions</i>  | chicken    | 0.11 | 0.28 | 0.54 | 0    | 0    | 0    | 0    |
| <i>All regions</i>  | dairy cow  | 0.05 | 0.23 | 0.31 | 0.28 | 0.1  | 0.03 | 0    |
| <i>All regions</i>  | goat       | 0.15 | 0.22 | 0.22 | 0    | 0.19 | 0.13 | 0    |
| <i>All regions</i>  | hen        | 0.21 | 0.29 | 0.42 | 0    | 0    | 0    | 0    |
| <i>All regions</i>  | pig        | 0.26 | 0.14 | 0.4  | 0.06 | 0.06 | 0.05 | 0.03 |
| <i>All regions</i>  | sheep      | 0.15 | 0.22 | 0.22 | 0    | 0.19 | 0.13 | 0    |

---

**Table S5.** Feed conservation ratio ranges for each animal group ( $F_a$ ). Assuming a uniform distribution between the maximum and minimum feed conversion ratio, the baseline ‘current’ model and all future scenarios were calculated 500 times from randomly sampled values of the distributions. Data sources: Brand et al. (9), Hasan and Soto (10), Marine Harvest (11), Mekonnen and Hoestra, Shike (3), Tolkamp (12), Wilkinson (13), Tacon and Metian (2). Tacon and Metian and Mekonnen and Hoestra were used as the primary bounding sources, but values were compared to the other listed articles – particularly for  $F_{min}$  and possible improved 2050 efficiencies.

| <b>Animal</b>                | <b><math>F_{min}</math></b> | <b><math>F_{max}</math></b> |
|------------------------------|-----------------------------|-----------------------------|
| <i>beef</i>                  | 6.0                         | 31.2                        |
| <i>dairy cow</i>             | 6.0                         | 31.2                        |
| <i>pig</i>                   | 3.0                         | 5.9                         |
| <i>goat</i>                  | 4.0                         | 12.9                        |
| <i>sheep</i>                 | 4.0                         | 12.9                        |
| <i>broiler chicken</i>       | 1.8                         | 3.5                         |
| <i>laying hen</i>            | 1.8                         | 3.5                         |
| <i>freshwater finfish</i>    | 1.1                         | 1.6                         |
| <i>freshwater crustacean</i> | 1.1                         | 1.8                         |
| <i>marine finfish</i>        | 1.1                         | 1.6                         |
| <i>marine crustacean</i>     | 1.1                         | 1.7                         |

**Results and Sensitivity**

**Table S6.** Percent land spared (positive values) or used (negative values) when accounting for feed or feed & grazing land-use requirement under the mixed and marine scenarios.

| <i>Country</i>                    | <i>Feed Only</i>                   |                                     | <i>Feed &amp; Grazing</i>          |                                     |
|-----------------------------------|------------------------------------|-------------------------------------|------------------------------------|-------------------------------------|
|                                   | <i>% Mixed Land Used or Spared</i> | <i>% Marine Land Used or Spared</i> | <i>% Mixed Land Used or Spared</i> | <i>% Marine Land Used or Spared</i> |
| Afghanistan                       | 9%                                 | 9%                                  | 7%                                 | 7%                                  |
| Albania                           | 14%                                | 14%                                 | 10%                                | 10%                                 |
| Algeria                           | 15%                                | 15%                                 | 19%                                | 19%                                 |
| American Samoa                    | 60%                                | 60%                                 | 22%                                | 22%                                 |
| Angola                            | 56%                                | 56%                                 | 30%                                | 29%                                 |
| Antigua and Barbuda               | 38%                                | 38%                                 | 4%                                 | 4%                                  |
| Argentina                         | 19%                                | 16%                                 | 37%                                | 36%                                 |
| Armenia                           | 7%                                 | 10%                                 | 19%                                | 18%                                 |
| Aruba                             | 0%                                 | 0%                                  | 0%                                 | 0%                                  |
| Australia                         | 15%                                | 5%                                  | 22%                                | 21%                                 |
| Austria                           | 25%                                | 24%                                 | 20%                                | 19%                                 |
| Azerbaijan                        | 8%                                 | 8%                                  | 14%                                | 13%                                 |
| Bahamas                           | 33%                                | 33%                                 | 10%                                | 9%                                  |
| Bahrain                           | 25%                                | 25%                                 | 24%                                | 24%                                 |
| Bangladesh                        | -5%                                | 0%                                  | 9%                                 | 9%                                  |
| Barbados                          | 42%                                | 42%                                 | 9%                                 | 9%                                  |
| Belarus                           | 26%                                | 26%                                 | 21%                                | 20%                                 |
| Belgium                           | 24%                                | 18%                                 | 21%                                | 20%                                 |
| Belize                            | 13%                                | -30%                                | 24%                                | 10%                                 |
| Benin                             | 32%                                | 33%                                 | 18%                                | 18%                                 |
| Bermuda                           | 0%                                 | 0%                                  | 7%                                 | 6%                                  |
| Bhutan                            | 5%                                 | 5%                                  | 6%                                 | 5%                                  |
| Bolivia (Plurinational State of)  | 24%                                | 22%                                 | 37%                                | 37%                                 |
| Bonaire, Saint Eustatius and Saba | 0%                                 | 0%                                  | 0%                                 | 0%                                  |
| Bosnia and Herzegovina            | 9%                                 | 10%                                 | 7%                                 | 7%                                  |
| Botswana                          | 26%                                | 26%                                 | 17%                                | 16%                                 |
| Brazil                            | 26%                                | 24%                                 | 29%                                | 28%                                 |
| British Virgin Islands            | 0%                                 | 0%                                  | 39%                                | 39%                                 |
| Brunei Darussalam                 | 0%                                 | 0%                                  | 47%                                | 47%                                 |
| Bulgaria                          | 18%                                | 11%                                 | 12%                                | 9%                                  |
| Burkina Faso                      | 60%                                | 60%                                 | 10%                                | 10%                                 |
| Burundi                           | 25%                                | 25%                                 | 12%                                | 11%                                 |

|                                          |     |      |     |     |
|------------------------------------------|-----|------|-----|-----|
| Cabo Verde                               | 21% | 21%  | 15% | 15% |
| Cambodia                                 | 18% | 30%  | 28% | 30% |
| Cameroon                                 | 42% | 42%  | 29% | 28% |
| Canada                                   | 21% | 15%  | 23% | 21% |
| Cayman Islands                           | 0%  | 0%   | 0%  | 0%  |
| Central African Republic                 | 0%  | 0%   | 25% | 25% |
| Chad                                     | 31% | 31%  | 16% | 16% |
| Channel Islands                          | 0%  | 0%   | 0%  | 0%  |
| Chile                                    | 3%  | -37% | 20% | 18% |
| China, Hong Kong SAR                     | 0%  | 0%   | 50% | 50% |
| China, Macao SAR                         | 0%  | 0%   | 51% | 51% |
| China, mainland                          | 18% | 24%  | 26% | 28% |
| China, Taiwan Province<br>of             | 16% | 3%   | 14% | 12% |
| Colombia                                 | 27% | 28%  | 18% | 17% |
| Comoros                                  | 20% | 20%  | 15% | 15% |
| Congo                                    | 60% | 60%  | 41% | 41% |
| Cook Islands                             | 60% | 60%  | 38% | 38% |
| Costa Rica                               | 48% | 48%  | 14% | 13% |
| Cote d'Ivoire                            | 36% | 35%  | 15% | 15% |
| Croatia                                  | 18% | 13%  | 14% | 12% |
| Cuba                                     | 35% | 34%  | 19% | 19% |
| Cyprus                                   | 44% | 44%  | 19% | 19% |
| Czech Republic                           | 0%  | 0%   | 1%  | 0%  |
| Czechia                                  | 25% | 26%  | 27% | 28% |
| Czechoslovakia                           | 0%  | 0%   | 0%  | 0%  |
| Democratic People's<br>Republic of Korea | 22% | 23%  | 27% | 27% |
| Democratic Republic of<br>the Congo      | 48% | 49%  | 33% | 33% |
| Denmark                                  | 30% | 28%  | 18% | 17% |
| Djibouti                                 | 0%  | 0%   | 22% | 22% |
| Dominica                                 | 45% | 45%  | 10% | 10% |
| Dominican Republic                       | 33% | 33%  | 22% | 21% |
| Ecuador                                  | 18% | -8%  | 20% | 19% |
| Egypt                                    | -4% | -40% | 23% | 20% |
| El Salvador                              | 20% | 19%  | 10% | 10% |
| Equatorial Guinea                        | 60% | 60%  | 38% | 38% |
| Eritrea                                  | 11% | 10%  | 6%  | 6%  |
| Estonia                                  | 17% | 17%  | 12% | 11% |
| Ethiopia                                 | 10% | 9%   | 6%  | 5%  |
| Falkland Islands<br>(Malvinas)           | 0%  | 0%   | 19% | 19% |
| Faroe Islands                            | 0%  | 0%   | 15% | 15% |

|                                     |     |      |     |     |
|-------------------------------------|-----|------|-----|-----|
| Fiji                                | 55% | 55%  | 23% | 22% |
| Finland                             | 20% | 14%  | 17% | 15% |
| France                              | 20% | 16%  | 18% | 17% |
| French Guiana                       | 33% | 33%  | 32% | 32% |
| French Polynesia                    | 60% | 60%  | 24% | 24% |
| Gabon                               | 50% | 50%  | 25% | 24% |
| Gambia                              | 17% | 17%  | 11% | 10% |
| Georgia                             | 11% | 11%  | 6%  | 5%  |
| Germany                             | 24% | 22%  | 16% | 16% |
| Ghana                               | 25% | 31%  | 15% | 16% |
| Greece                              | 9%  | -13% | 14% | 9%  |
| Greenland                           | 0%  | 0%   | 12% | 12% |
| Grenada                             | 20% | 20%  | 22% | 21% |
| Guadeloupe                          | 60% | 60%  | 48% | 48% |
| Guam                                | 2%  | -3%  | 29% | 27% |
| Guatemala                           | 22% | 19%  | 15% | 15% |
| Guinea                              | 18% | 18%  | 13% | 12% |
| Guinea-Bissau                       | 21% | 20%  | 10% | 10% |
| Guyana                              | 26% | 25%  | 10% | 9%  |
| Haiti                               | 42% | 42%  | 22% | 21% |
| Honduras                            | 18% | 9%   | 14% | 13% |
| Hungary                             | 22% | 19%  | 17% | 15% |
| Iceland                             | 0%  | 0%   | 12% | 12% |
| India                               | 6%  | 6%   | 5%  | 5%  |
| Indonesia                           | -2% | -13% | 23% | 18% |
| Iran (Islamic Republic of)          | 11% | 11%  | 13% | 13% |
| Iraq                                | 7%  | 14%  | 17% | 18% |
| Ireland                             | 13% | 10%  | 19% | 18% |
| Israel                              | 21% | 23%  | 38% | 38% |
| Italy                               | 23% | 23%  | 19% | 19% |
| Jamaica                             | 42% | 43%  | 29% | 29% |
| Japan                               | 26% | 15%  | 31% | 31% |
| Jordan                              | 21% | 21%  | 28% | 28% |
| Kazakhstan                          | 13% | 6%   | 18% | 17% |
| Kenya                               | 16% | 16%  | 11% | 10% |
| Kiribati                            | 0%  | 0%   | 0%  | 0%  |
| Kuwait                              | 18% | 17%  | 25% | 25% |
| Kyrgyzstan                          | 15% | 14%  | 17% | 17% |
| Lao People's Democratic<br>Republic | 18% | 36%  | 29% | 36% |
| Latvia                              | 14% | 5%   | 10% | 7%  |
| Lebanon                             | 17% | 17%  | 34% | 33% |
| Lesotho                             | 21% | 22%  | 14% | 13% |

|                                  |     |      |     |     |
|----------------------------------|-----|------|-----|-----|
| Liberia                          | 30% | 30%  | 21% | 20% |
| Libya                            | 16% | 16%  | 16% | 16% |
| Liechtenstein                    | 0%  | 0%   | 1%  | 0%  |
| Lithuania                        | 15% | 11%  | 11% | 10% |
| Luxembourg                       | 16% | 15%  | 13% | 13% |
| Madagascar                       | 49% | 49%  | 12% | 12% |
| Malawi                           | 41% | 42%  | 27% | 27% |
| Malaysia                         | 15% | 3%   | 18% | 18% |
| Maldives                         | 0%  | 0%   | 0%  | 0%  |
| Mali                             | 19% | 19%  | 12% | 12% |
| Malta                            | 24% | 24%  | 13% | 12% |
| Marshall Islands                 | 0%  | 0%   | 0%  | 0%  |
| Martinique                       | 60% | 60%  | 47% | 47% |
| Mauritania                       | 0%  | 0%   | 14% | 14% |
| Mauritius                        | 33% | 28%  | 33% | 32% |
| Mayotte                          | 0%  | 0%   | 0%  | 0%  |
| Mexico                           | 35% | 33%  | 35% | 35% |
| Micronesia (Federated States of) | 39% | 39%  | 49% | 49% |
| Mongolia                         | 12% | 12%  | 15% | 15% |
| Montenegro                       | 11% | 11%  | 7%  | 7%  |
| Montserrat                       | 0%  | 0%   | 25% | 24% |
| Morocco                          | 13% | 13%  | 18% | 18% |
| Mozambique                       | 33% | 33%  | 15% | 14% |
| Myanmar                          | 8%  | 16%  | 11% | 12% |
| Namibia                          | 27% | 27%  | 18% | 18% |
| Nauru                            | 0%  | 0%   | 0%  | 0%  |
| Nepal                            | 11% | 13%  | 10% | 10% |
| Netherlands                      | 24% | 24%  | 15% | 14% |
| New Caledonia                    | 21% | 3%   | 29% | 28% |
| New Zealand                      | 9%  | 7%   | 10% | 10% |
| Nicaragua                        | 25% | 19%  | 14% | 14% |
| Niger                            | 17% | 16%  | 13% | 13% |
| Nigeria                          | 45% | 47%  | 24% | 24% |
| Niue                             | 59% | 59%  | 8%  | 8%  |
| Norfolk Island                   | 0%  | 0%   | 0%  | 0%  |
| Northern Mariana Is.             | 0%  | 0%   | 0%  | 0%  |
| Norway                           | -5% | -41% | 16% | 11% |
| Occupied Palestinian Territory   | 22% | 21%  | 25% | 25% |
| Oman                             | 14% | 14%  | 18% | 17% |
| Pakistan                         | 10% | 10%  | 11% | 11% |
| Palau                            | 0%  | 0%   | 0%  | 0%  |

|                                     |     |     |     |     |
|-------------------------------------|-----|-----|-----|-----|
| Panama                              | 38% | 32% | 32% | 31% |
| Papua New Guinea                    | 55% | 56% | 44% | 44% |
| Paraguay                            | 20% | 18% | 37% | 36% |
| Peru                                | 33% | 31% | 23% | 23% |
| Philippines                         | 21% | 0%  | 30% | 15% |
| Poland                              | 21% | 20% | 14% | 13% |
| Portugal                            | 26% | 24% | 18% | 18% |
| Puerto Rico                         | 60% | 60% | 13% | 12% |
| Qatar                               | 24% | 24% | 23% | 23% |
| R'union                             | 60% | 60% | 13% | 12% |
| Republic of Korea                   | 33% | 26% | 42% | 42% |
| Republic of Moldova                 | 26% | 26% | 15% | 15% |
| Romania                             | 16% | 13% | 12% | 10% |
| Russian Federation                  | 25% | 21% | 21% | 21% |
| Rwanda                              | 0%  | 0%  | 15% | 15% |
| Saint Kitts and Nevis               | 0%  | 0%  | 45% | 45% |
| Saint Lucia                         | 0%  | 0%  | 31% | 31% |
| Saint Pierre and<br>Miquelon        | 0%  | 0%  | 0%  | 0%  |
| Saint Vincent and the<br>Grenadines | 55% | 55% | 21% | 21% |
| Samoa                               | 60% | 60% | 36% | 35% |
| Sao Tome and Principe               | 17% | 17% | 16% | 16% |
| Saudi Arabia                        | 21% | 16% | 23% | 22% |
| Senegal                             | 26% | 26% | 12% | 12% |
| Serbia                              | 19% | 17% | 15% | 14% |
| Serbia and Montenegro               | 0%  | 0%  | 0%  | 0%  |
| Seychelles                          | 60% | 60% | 37% | 37% |
| Sierra Leone                        | 58% | 58% | 16% | 15% |
| Singapore                           | 0%  | 0%  | 39% | 39% |
| Slovakia                            | 16% | 16% | 12% | 12% |
| Slovenia                            | 20% | 20% | 16% | 16% |
| Solomon Islands                     | 60% | 60% | 26% | 26% |
| Somalia                             | 15% | 14% | 10% | 10% |
| South Africa                        | 35% | 33% | 35% | 35% |
| South Sudan                         | 10% | 9%  | 6%  | 6%  |
| Spain                               | 31% | 29% | 23% | 22% |
| Sri Lanka                           | 21% | 22% | 12% | 12% |
| Sudan                               | 7%  | 7%  | 6%  | 5%  |
| Suriname                            | 31% | 30% | 37% | 36% |
| Swaziland                           | 24% | 24% | 15% | 14% |
| Sweden                              | 20% | 20% | 18% | 18% |
| Switzerland                         | 20% | 20% | 15% | 15% |



|                                              |     |     |     |     |
|----------------------------------------------|-----|-----|-----|-----|
| Syrian Arab Republic                         | 16% | 16% | 18% | 18% |
| Tajikistan                                   | 6%  | 5%  | 8%  | 7%  |
| Thailand                                     | 35% | 26% | 33% | 27% |
| The former Yugoslav<br>Republic of Macedonia | 8%  | 8%  | 6%  | 6%  |
| Timor-Leste                                  | 47% | 47% | 43% | 43% |
| Togo                                         | 28% | 28% | 21% | 20% |
| Tokelau                                      | 0%  | 0%  | 0%  | 0%  |
| Tonga                                        | 60% | 60% | 41% | 41% |
| Trinidad and Tobago                          | 35% | 35% | 11% | 11% |
| Tunisia                                      | 10% | 8%  | 14% | 14% |
| Turkey                                       | 12% | 9%  | 18% | 17% |
| Turkmenistan                                 | 11% | 11% | 18% | 18% |
| Turks and Caicos Islands                     | 0%  | 0%  | 0%  | 0%  |
| Tuvalu                                       | 0%  | 0%  | 0%  | 0%  |
| Uganda                                       | 14% | 17% | 9%  | 8%  |
| Ukraine                                      | 21% | 18% | 19% | 18% |
| United Arab Emirates                         | 0%  | 0%  | 26% | 26% |
| United Kingdom                               | 12% | -2% | 18% | 16% |
| United Republic of<br>Tanzania               | 21% | 20% | 7%  | 7%  |
| United States of America                     | 22% | 20% | 25% | 24% |
| United States Virgin<br>Islands              | 0%  | 0%  | 34% | 34% |
| Uruguay                                      | 15% | 11% | 33% | 32% |
| US Virgin Islands                            | 0%  | 0%  | 0%  | 0%  |
| Uzbekistan                                   | 4%  | 5%  | 20% | 20% |
| Vanuatu                                      | 31% | 30% | 21% | 20% |
| Venezuela (Bolivarian<br>Republic of)        | 34% | 33% | 22% | 22% |
| Viet Nam                                     | 15% | 7%  | 30% | 26% |
| Wallis and Futuna Islands                    | 60% | 60% | 23% | 23% |
| Western Sahara                               | 0%  | 0%  | 24% | 24% |
| Yemen                                        | 24% | 24% | 24% | 24% |
| Yugoslavia                                   | 0%  | 0%  | 0%  | 0%  |
| Zambia                                       | 33% | 36% | 34% | 34% |
| Zanzibar                                     | 0%  | 0%  | 0%  | 0%  |
| Zimbabwe                                     | 15% | 16% | 14% | 14% |

### *Comparisons to other studies*

We took several steps to test the overall performance and sensitivity of our model given our assumptions. First, we examined the general patterns of feed, paying particular attention to aquaculture model outputs due to the limited amount of data at the country level (Table S7). It has been estimated ca. 55 – 70 million tonnes of total feed (compound and farm-made, of which contain crop inputs) is used for aquaculture (2, 14, 15). Our values are based on (harmonized) FAO commodity balance data (i.e., crop primary equivalence). Troell et al. (15) estimate crop equivalences for aquaculture compound feed at ca. 30 million tonnes. We simplified the number of crops and based our values on Tilman and Clark (6) regional percentages, which produces 40 million tonnes of crop equivalence (Table S7), or 4% of total crops used for feed in our analysis. Our model likely produces a higher value, but equivalent crop percentage, since we account for, but do not differentiate between, compound and farm-made crop use, as well as the calculations are based on more recent FAO (2014) aquaculture production estimates (7).

In another benchmark, FAO estimates that globally approximately one-third of crops are destined for feed (16). The total crop production in 2013 (FAOSTAT (1)) of wheat, maize, soy, rapeseed, pulses, barley, and cassava products was 2.7 billion tonnes; our ‘current’ global livestock and poultry-only estimate (meat plus dairy and eggs; 980 million tonnes) results in 36% of that total. Accounting for aquaculture increases that to 38%.

**Table S7.** Model outputs of total animal crop feed (tonnes) for the four scenarios.

| Group                   | Current               |                       |                       |                       |
|-------------------------|-----------------------|-----------------------|-----------------------|-----------------------|
|                         | (baseline)            | BAU 2050              | Mixed 2050            | Marine 2050           |
| <i>Dairy &amp; eggs</i> | 2.7E+08               | 6.2E+08               | 6.2E+08               | 6.2E+08               |
| <i>Meat</i>             | 7.1E+08               | 2.2E+09               | 1.5E+09               | 1.5E+09               |
| <i>Seafood</i>          | 4.0E+07               | 9.1E+07               | 1.8E+08               | 2.1E+08               |
| <b><i>Total</i></b>     | <b><i>1.0E+09</i></b> | <b><i>2.9E+09</i></b> | <b><i>2.3E+09</i></b> | <b><i>2.3E+09</i></b> |

In addition to evaluating crop-use metrics, we assessed the efficacy of the model by quantifying the model overestimation of cropland compared with FAO estimates (1). This is somewhat challenging, as multiple crops can be cultivated in any given location, either through ‘multiple cropping’ or ‘crop rotation’ (17). In addition, surveyed and ground-truthed estimates of the area of each crop are not currently collected in many nations (18). As such, we assessed measures of error of our model relative to current values with three different scenarios. First, we ran the baseline (current) scenario (the assumptions used and presented in the main text) and quantified how often the model overestimated the area of each crop. We calculated overestimates based on both FAO values for a specific crop and total reported area across these crops. The latter portion was important since, as we mentioned, multiple crops can be grown on same land and thus total cropped area may be a more representative threshold than specific FAO crop estimates. No error estimates are available around the FAO values, so we set our limit of an ‘overestimate’ at 1,000ha in order to detect the most aberrant values. We then tabulated the number of regions that went over for each crop, the relative error rate of the 1,610 values (7 crops for 230 regions), the number of regions that went over the summation of total land of those seven crops, and the average hectares overestimated for the total cropland ( $\pm$  standard error) (Table S8 and S9). For context and comparison, we ran the model and calculated the same overestimation metrics for two other scenarios: (1) feed requirements only being met by domestic production and (2) feed requirements met by imports only (i.e., by exporting countries).

**Table S8.** Number of FAO regions that overestimated area for each crop (of a total 230 regions) by more than 1,000ha and the overestimation rate of the three test scenarios.

| Scenario            | Wheat | Maize | Soy | Rapeseed | Pulses | Barley | Cassava | Total | Error Rate |
|---------------------|-------|-------|-----|----------|--------|--------|---------|-------|------------|
| <i>Current</i>      | 0     | 6     | 5   | 6        | 34     | 14     | 3       | 68    | 0.04       |
| <i>All domestic</i> | 20    | 58    | 63  | 19       | 30     | 26     | 4       | 220   | 0.14       |
| <i>All imports</i>  | 0     | 1     | 1   | 13       | 10     | 14     | 1       | 40    | 0.02       |

**Table S9.** Number of regions, average, and standard error (SE) of hectares overestimated (> 1,000ha) when compared to the total seven-crop area of each country.

| <b>Scenario</b>     | <b>No. Regions</b> | <b>Average ha overestimate</b> | <b>SE</b> |
|---------------------|--------------------|--------------------------------|-----------|
| <i>Current</i>      | 10                 | 435,177                        | 228,437   |
| <i>All domestic</i> | 60                 | 418,616                        | 148,546   |
| <i>All imports</i>  | 15                 | 1,819,267                      | 621,472   |

We find our ‘current’ simulation model used in the study performs relatively well compared to the extremes (all imports or domestic). Importantly, we also compared our values of area required for feed-crops to the estimated total area of land that is currently cultivated for all crops (not just crops evaluated in this study) in each country. We found our model outputs are within the bounds of cultivated FAO land estimates (mean  $\pm$  SE = 14%  $\pm$  1.3%). It should also be noted, there are no values available for how much cropland each country uses for feed, so underestimates cannot be assessed, nor can the degree to which they balance out overestimates. Encouraging the gathering of such data should be, and currently is, a priority of global organizations including the World Bank and FAO.

## SI References

1. FAO (2013) *FAOSTAT database collections* (Food and Agriculture Organization of the United Nations, Rome, Italy) Available at: <http://faostat.fao.org>.
2. Tacon AGJ, Metian M (2015) Feed Matters: Satisfying the Feed Demand of Aquaculture. *Rev Fish Sci Aquac* 23(1):1–10.
3. Mekonnen MM, Hoekstra AY (2012) A Global Assessment of the Water Footprint of Farm Animal Products. *Ecosystems* 15(3):401–415.
4. Tacon AGJ, Metian M (2008) Global overview on the use of fish meal and fish oil in industrially compounded aquafeeds: Trends and future prospects. *Aquaculture* 285(1–4):146–158.
5. Bognár A (2002) *Tables on weight yield of food and retention factors of food constituents for the calculation of nutrient composition of cooked foods (dishes)* (BFE).
6. Tilman D, Clark M (2014) Global diets link environmental sustainability and human health. *Nature* 515(7528):518–522.
7. FAO (2016) *The State of World Fisheries and Aquaculture 2016 (SOFIA)* (Rome, Italy).
8. Alexandratos N, Bruinsma J, others (2012) *World agriculture towards 2030/2050: the 2012 revision* (ESA Working paper Rome, FAO).
9. Brand TS, et al. (2013) Effects of dietary energy content and provision of  $\beta$ -adrenergic agonist on the production of feedlot lambs. *South Afr J Anim Sci* 43:135–139.
10. Hasan M, Soto D (2017) *Improving feed conversion ratio and its impact on reducing greenhouse gas emissions in aquaculture* (FAO).
11. Marine Harvest (2017) *Salmon farming industry handbook*.
12. Tolkamp B, Wall E, Roehe R, Newbold J, Zaralis K (2010) Review of nutrient efficiency in different breeds of farm livestock. Department for Environment. *Food Rural Aff Lond* 105p.
13. Wilkinson JM (2011) Re-defining efficiency of feed use by livestock. *animal* 5(07):1014–1022.
14. Tacon AG, Metian MR, Tacon MAG, Hasan MR, Metian M (2011) *Demand and supply of feed ingredients for farmed fish and crustaceans: trends and prospects*.
15. Troell M, et al. (2014) Does aquaculture add resilience to the global food system? *Proc Natl Acad Sci* 111(37):13257–13263.

16. Herrero M, et al. (2015) Livestock and the Environment: What Have We Learned in the Past Decade? *Annu Rev Environ Resour* 40(1):177–202.
17. Iizumi T, Ramankutty N (2015) How do weather and climate influence cropping area and intensity? *Glob Food Secur* 4:46–50.
18. Craig M, Atkinson D (2013) *A Literature Review of Crop Area Estimation* (Technical Report, UN-FAO).
